# Supplementary material
Source: PubMed Central journal article supplement (PMC3241994)

A

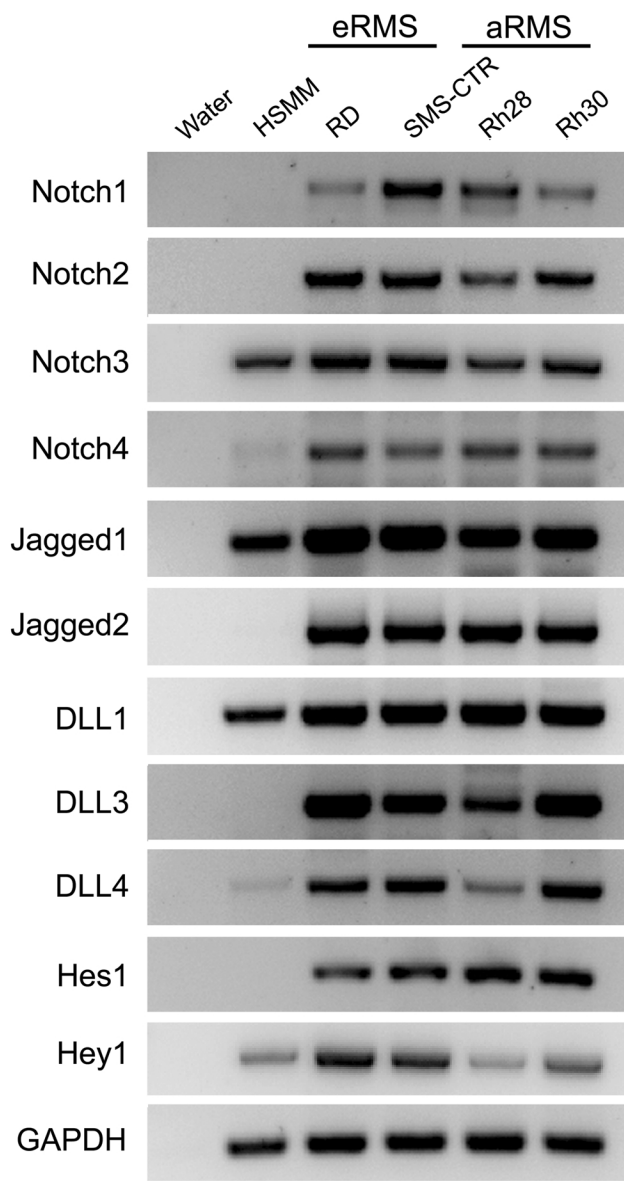

B

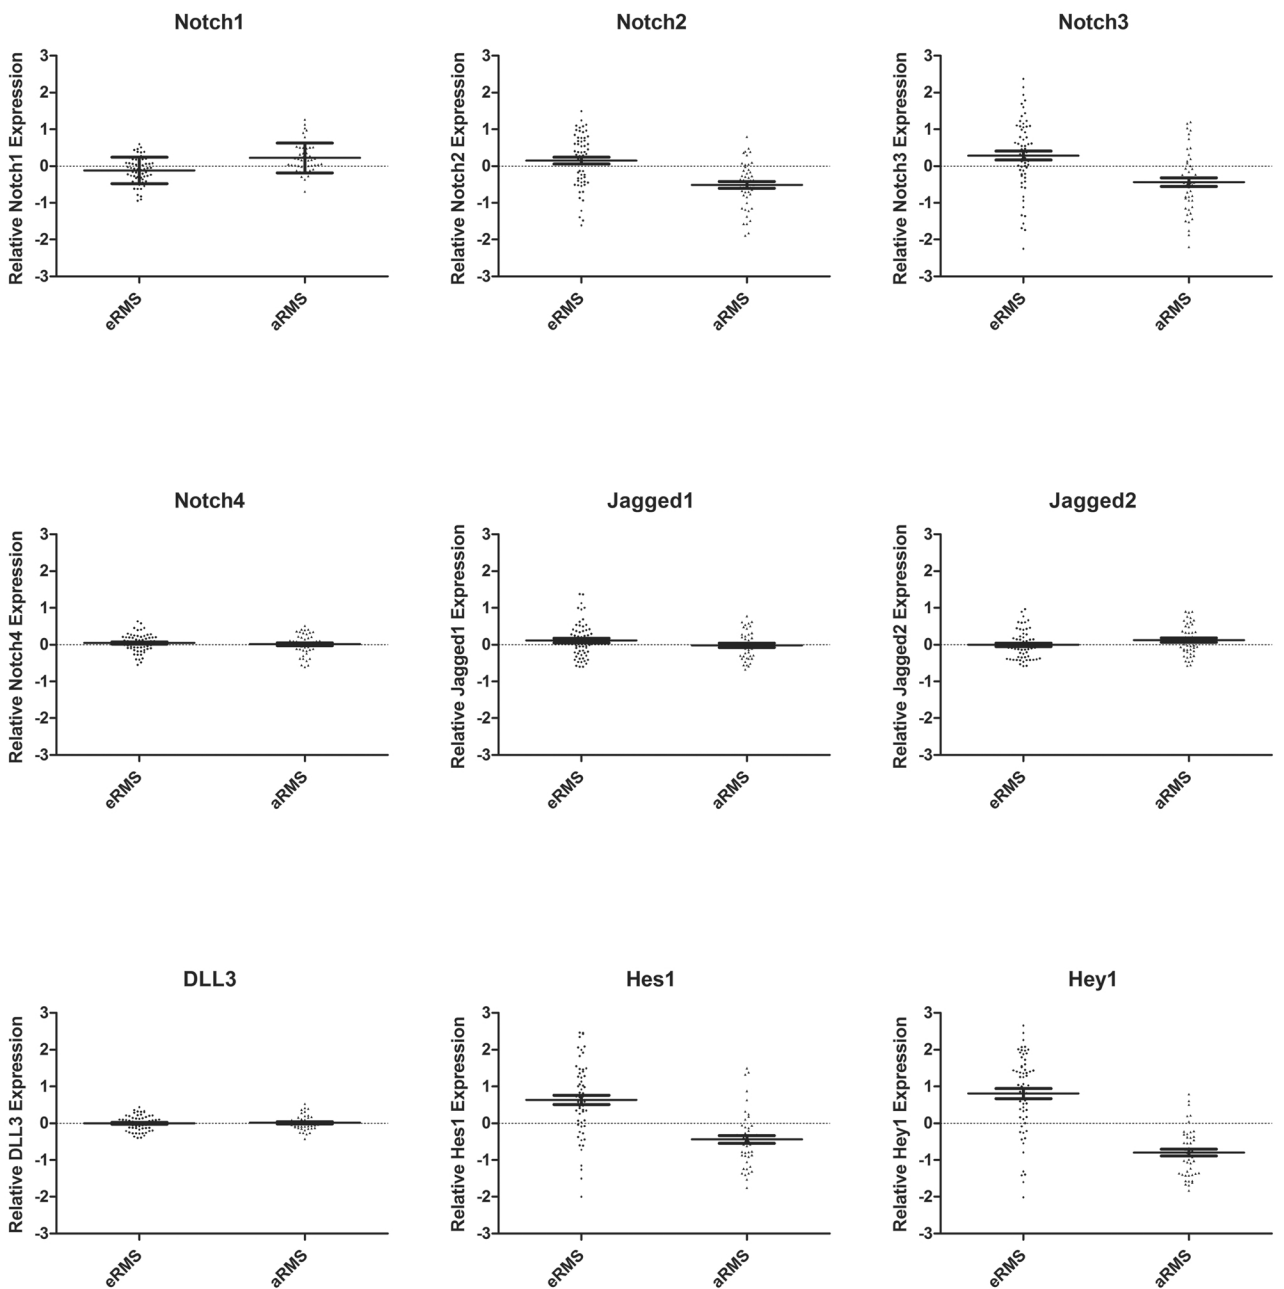

Supplement: NIHMS328402-supplement-9.pdf [file NIHMS328402-supplement-9.pdf]
